# Supplementary material
Source: MDPI journal article supplement (https://www.mdpi.com/2076-3417/12/22/11476)
Supplement: s1 [file s1 › applsci-2019377-supplementary.pdf]

**Table S1.** Diversity and goods coverage indices generated by 16S region.

| <b>Sample name</b> | <b>Shannon index</b> | <b>Simpson index</b> | <b>chao1 index</b> | <b>goods coverage</b> |
|--------------------|----------------------|----------------------|--------------------|-----------------------|
| A1                 | 4.508                | 0.908                | 1079.531           | 0.998                 |
| A2                 | 4.667                | 0.918                | 877.153            | 0.999                 |
| A3                 | 3.898                | 0.891                | 536.734            | 0.999                 |
| B1                 | 4.266                | 0.911                | 717.643            | 0.999                 |
| B2                 | 4.316                | 0.909                | 762.569            | 0.999                 |
| B3                 | 3.989                | 0.896                | 593.327            | 0.999                 |
| C1                 | 2.384                | 0.629                | 725.889            | 0.998                 |
| C2                 | 4.034                | 0.875                | 649.729            | 0.999                 |
| C3                 | 5.395                | 0.927                | 863.944            | 0.999                 |
| D1                 | 3.995                | 0.877                | 599.333            | 0.999                 |
| D2                 | 2.222                | 0.590                | 417.338            | 0.999                 |
| D3                 | 3.854                | 0.854                | 746.887            | 0.999                 |

**Table S2.** Diversity and goods coverage indices generated by ITS region.

| <b>Sample name</b> | <b>Shannon index</b> | <b>Simpson index</b> | <b>chao1 index</b> | <b>goods coverage</b> |
|--------------------|----------------------|----------------------|--------------------|-----------------------|
| A1                 | 3.960                | 0.848                | 626.272            | 0.999                 |
| A2                 | 2.981                | 0.788                | 448.036            | 0.999                 |
| A3                 | 3.708                | 0.844                | 518.474            | 0.999                 |
| B1                 | 3.489                | 0.858                | 413.750            | 0.999                 |
| B2                 | 2.400                | 0.664                | 451.800            | 0.999                 |
| B3                 | 2.609                | 0.726                | 543.289            | 0.999                 |
| C1                 | 3.465                | 0.850                | 245.023            | 1.000                 |
| C2                 | 2.626                | 0.799                | 153.000            | 1.000                 |
| C3                 | 3.126                | 0.826                | 226.810            | 1.000                 |
| D1                 | 2.742                | 0.749                | 166.032            | 1.000                 |
| D2                 | 3.109                | 0.843                | 172.111            | 1.000                 |
| D3                 | 2.298                | 0.709                | 125.038            | 1.000                 |

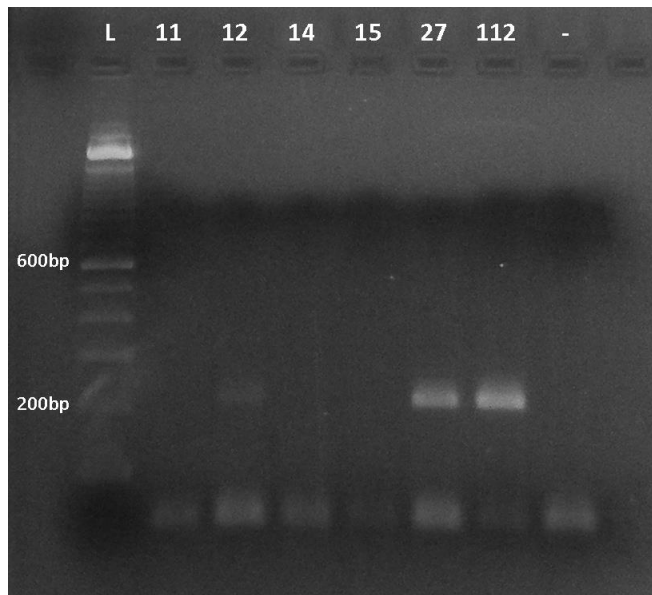

**Figure S1.** Gel electrophoresis of duplex PCR products for the identification of *V. ceranae*. Each lane corresponds to bee sample tested; L: molecular weight marker (100bp); (-): negative control.

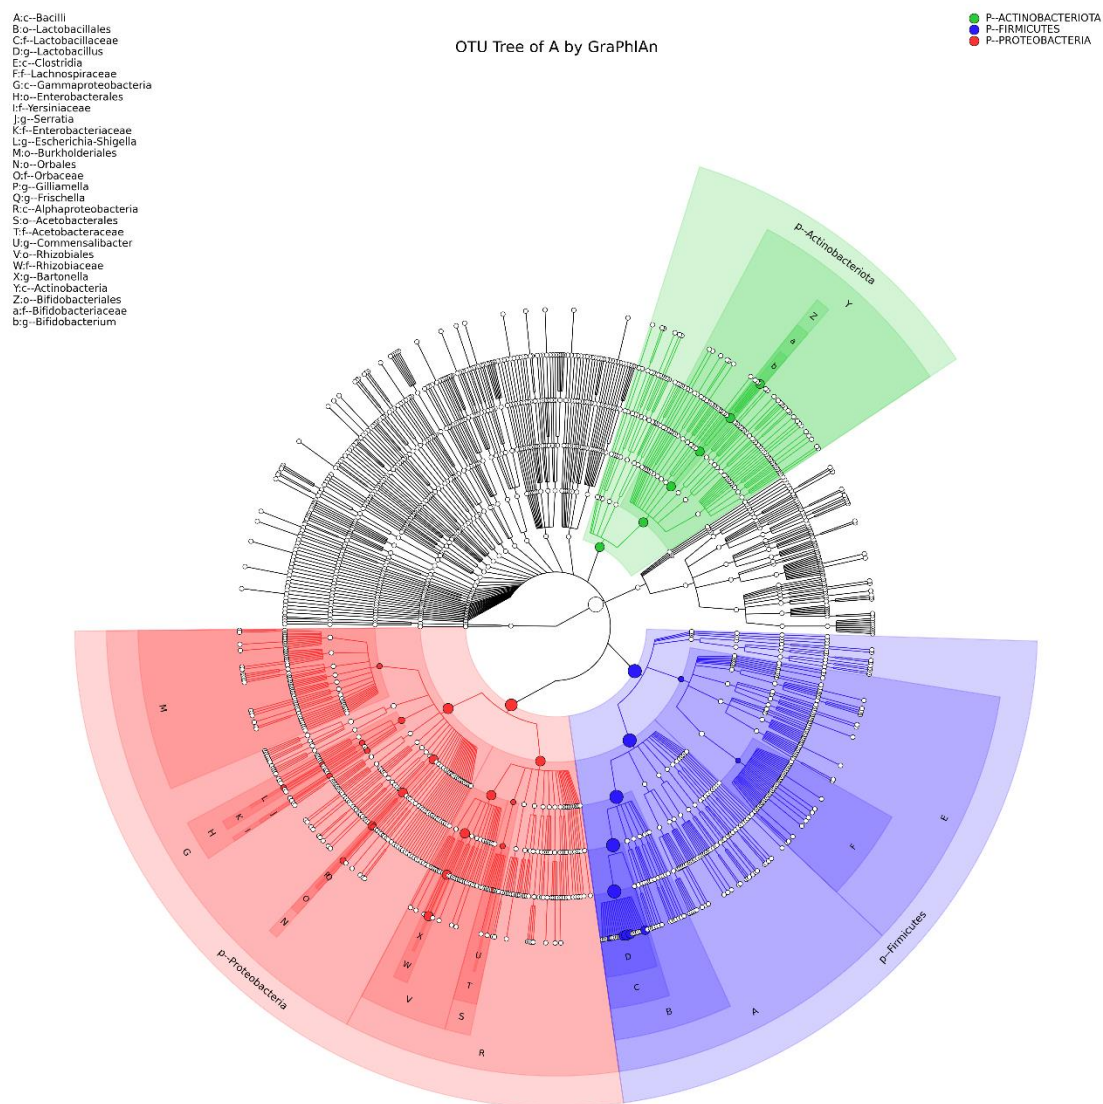

**Figure S2.** OTU annotation tree construct for group A generated by the 16S bacterial region. Different taxonomic ranks range inside out. The size of circles stands for abundance of species. Different colors stand for different phyla. Solid circles stand for the top 40 species in high abundance. Full size constructs are provided as supplementary material.

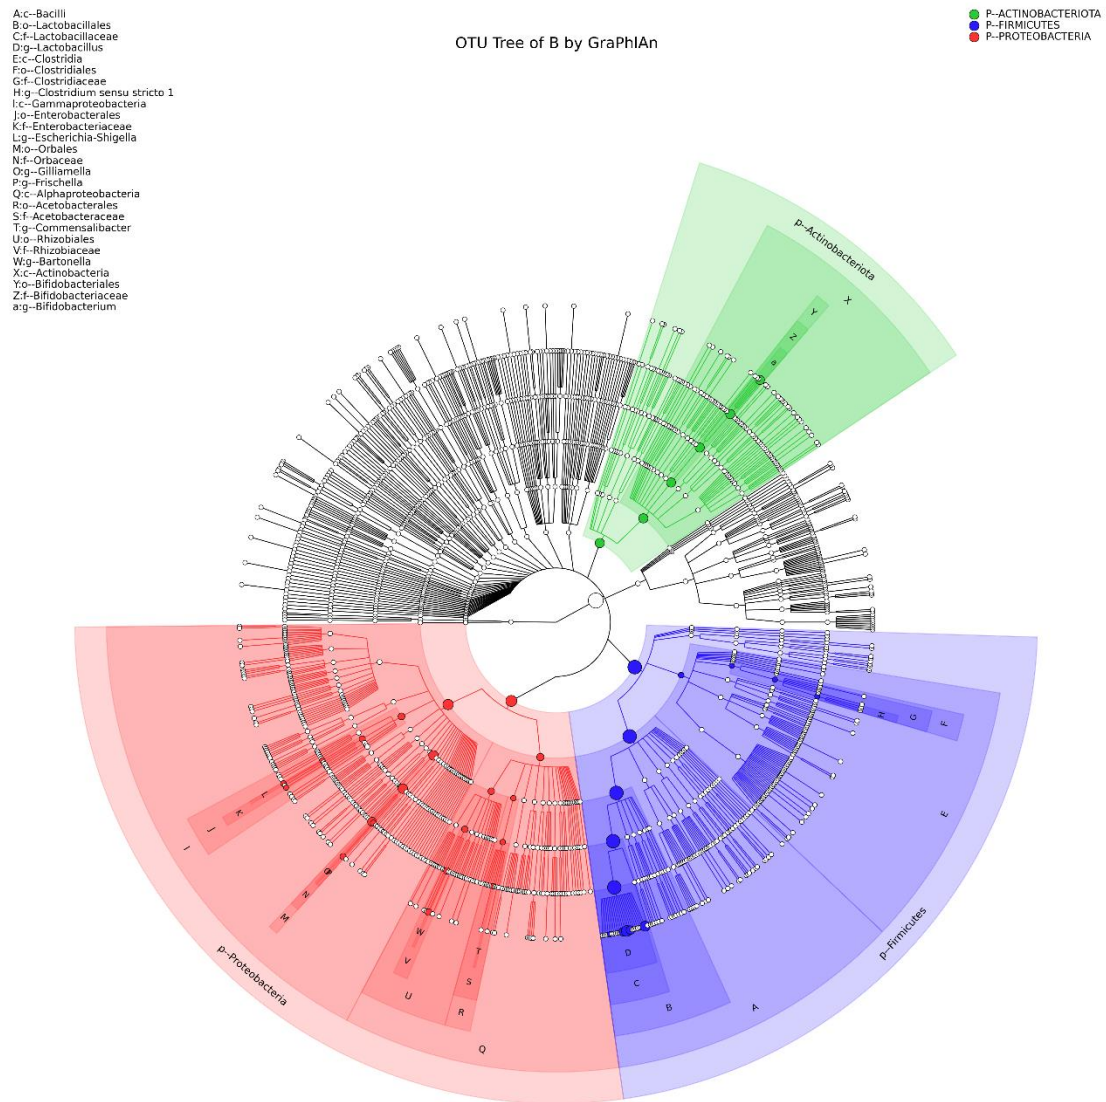

**Figure S3.** OTU annotation tree construct for group B generated by the 16S bacterial region. Different taxonomic ranks range inside out. The size of circles stands for abundance of species. Different colors stand for different phyla. Solid circles stand for the top 40 species in high abundance. Full size constructs are provided as supplementary material.

A.c--Acidobacteriales  
 B.o--Acidobacteriales  
 C.c--Bacilli  
 D.o--Lactobacillales  
 E.f--Lactobacillaceae  
 F.g--Lactobacillus  
 G.c--Clostridia  
 H.c--Gammaproteobacteria  
 I.o--Enterobacteriales  
 J.f--Morganellaceae  
 K.g--Buchnera  
 L.g--Arsenophonus  
 M.f--Enterobacteriaceae  
 N.g--Escherichia-Shigella  
 O.c--Alphaproteobacteria  
 P.o--Rickettsiales  
 Q.f--Mitochondria  
 R.g--Mitochondria  
 S.o--Rhizobiales  
 T.f--Beijerinckiaceae  
 U.g--Roseiarcus  
 V.c--Actinobacteria  
 W.o--Corynebacteriales  
 X.f--Mycobacteriaceae  
 Y.g--Mycobacterium  
 Z.c--Acidimicrobia  
 a.c--Nitrososphaeria  
 b.o--Nitrososphaerales  
 c.f--Nitrososphaeraeae

OTU Tree of C by GraPhlAn

P-ACIDOBACTERIOTA  
 P-ACTINOBACTERIOTA  
 P-CRENARCHAEOTA  
 P-FIRMICUTES  
 P-PROTEOBACTERIA

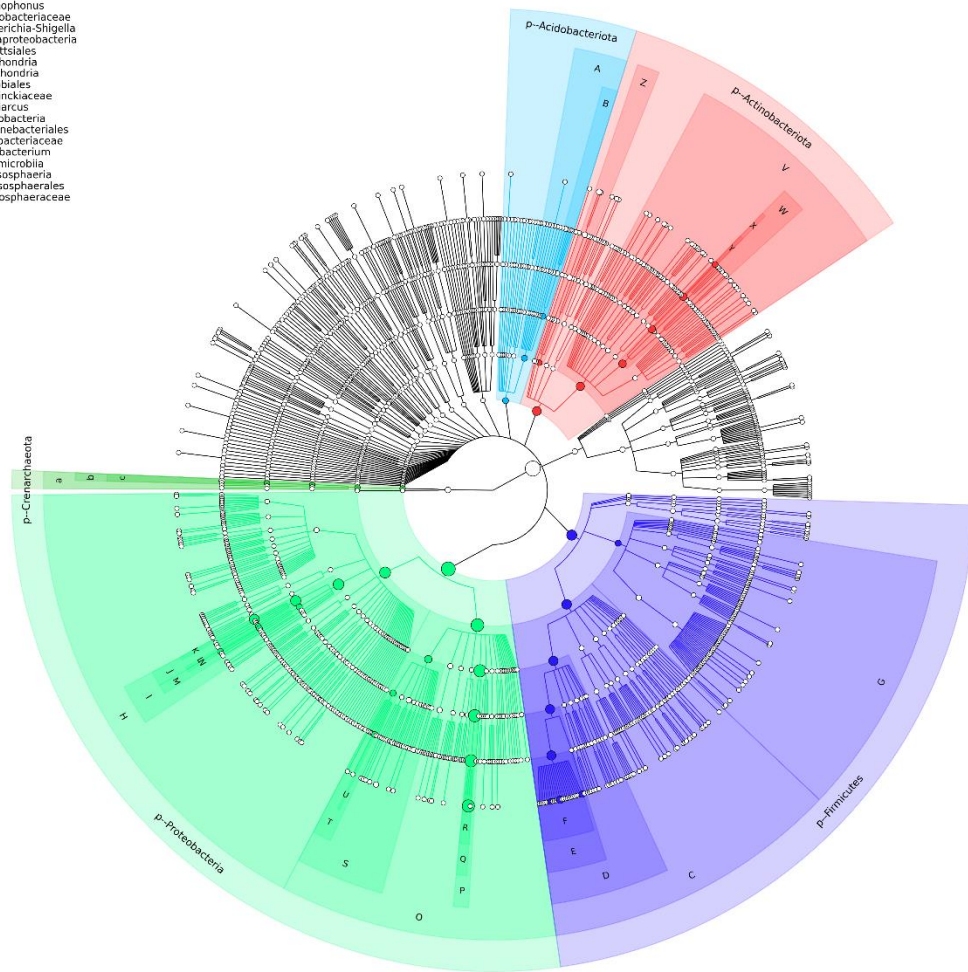

**Figure S4.** OTU annotation tree construct for group C generated by the 16S bacterial region. Different taxonomic ranks range inside out. The size of circles stands for abundance of species. Different colors stand for different phyla. Solid circles stand for the top 40 species in high abundance. Full size constructs are provided as supplementary material.

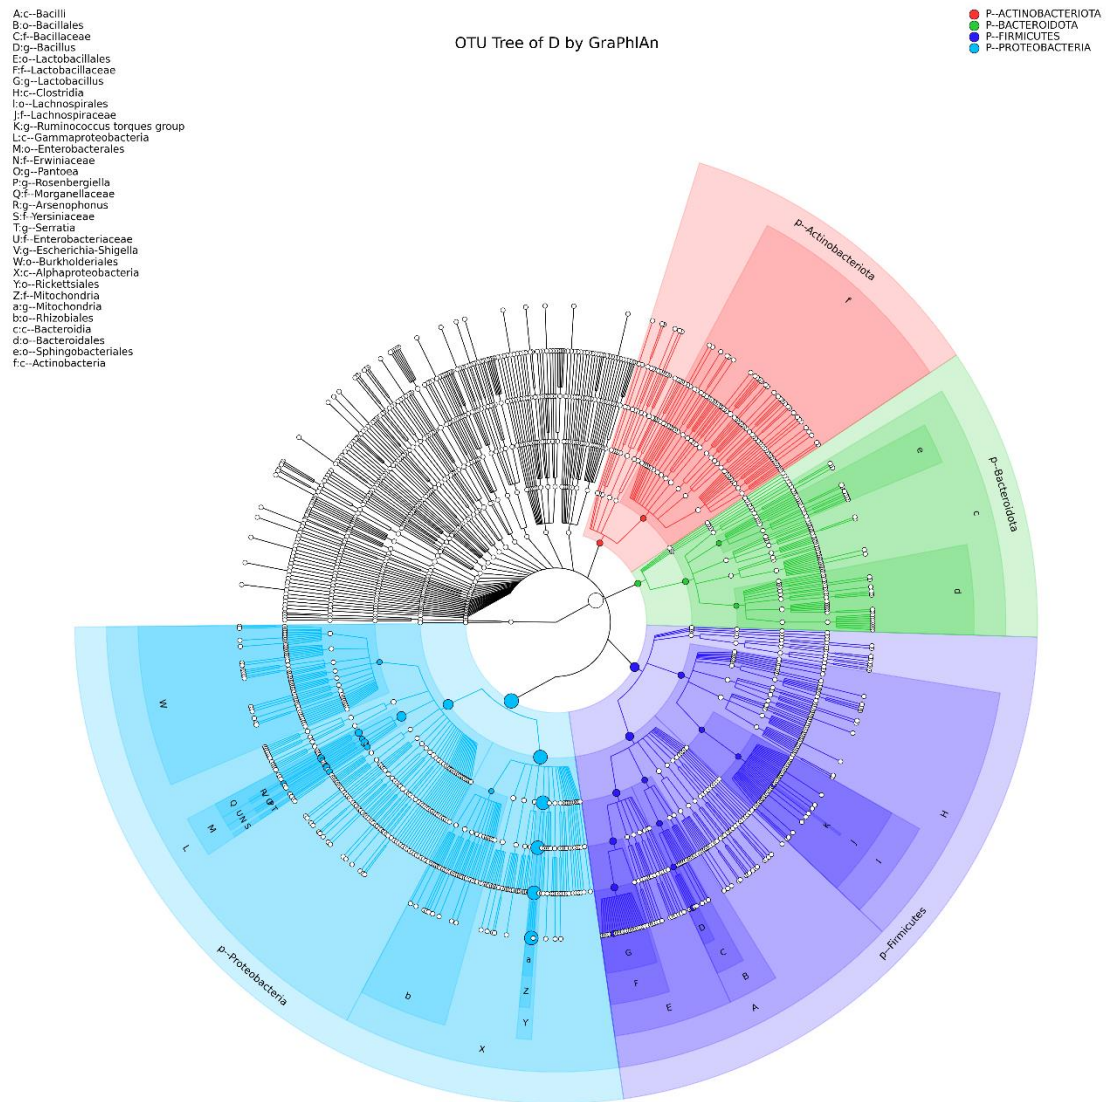

**Figure S5.** OTU annotation tree construct for group D generated by the 16S bacterial region. Different taxonomic ranks range inside out. The size of circles stands for abundance of species. Different colors stand for different phyla. Solid circles stand for the top 40 species in high abundance. Full size constructs are provided as supplementary material.

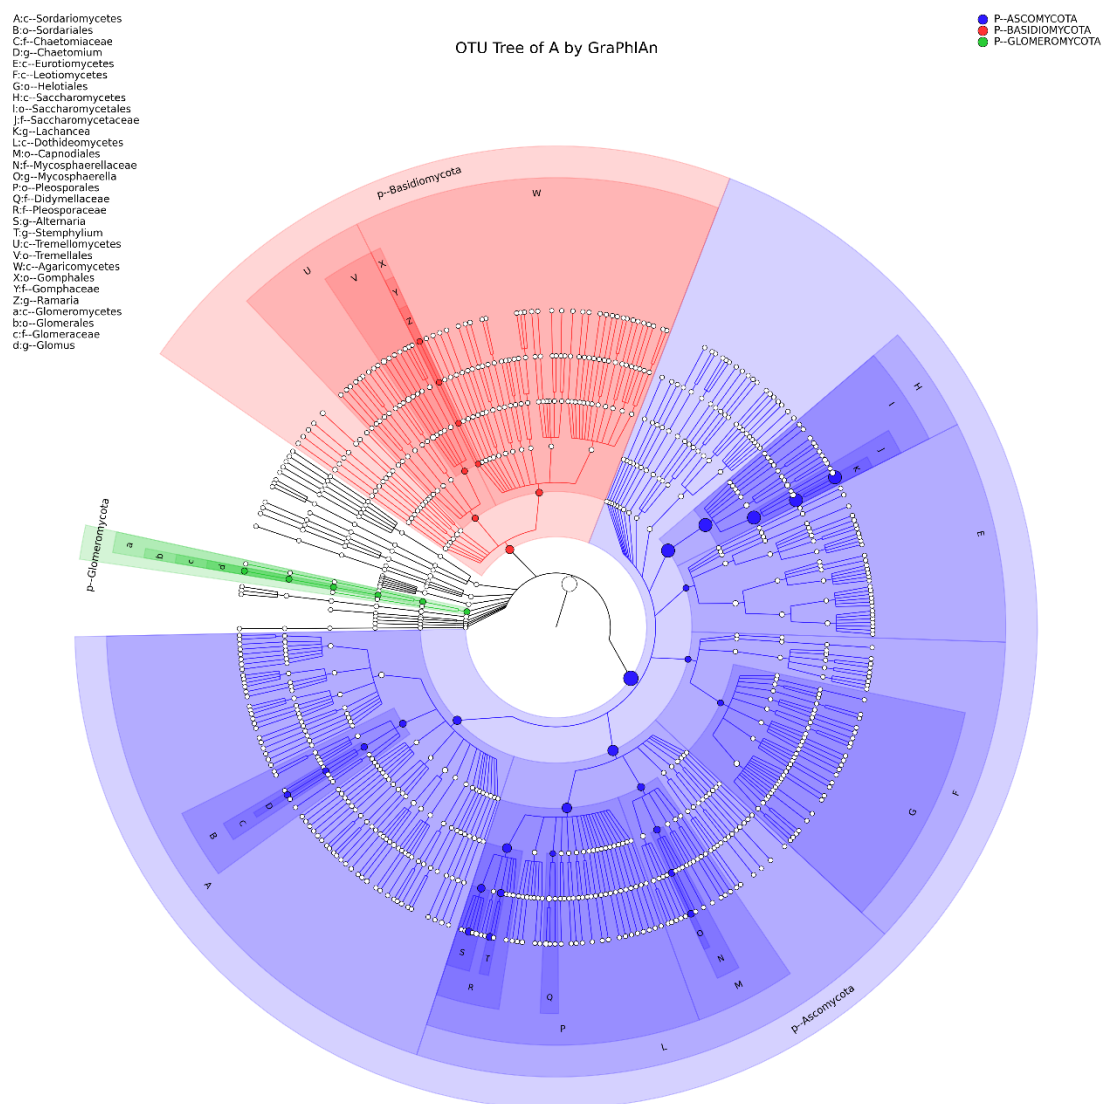

**Figure S6.** OTU annotation tree construct for group A generated by the ITS fungal region. Different taxonomic ranks range inside out. The size of circles stands for abundance of species. Different colors stand for different phyla. Solid circles stand for the top 40 species in high abundance. Full size constructs are provided as supplementary material.

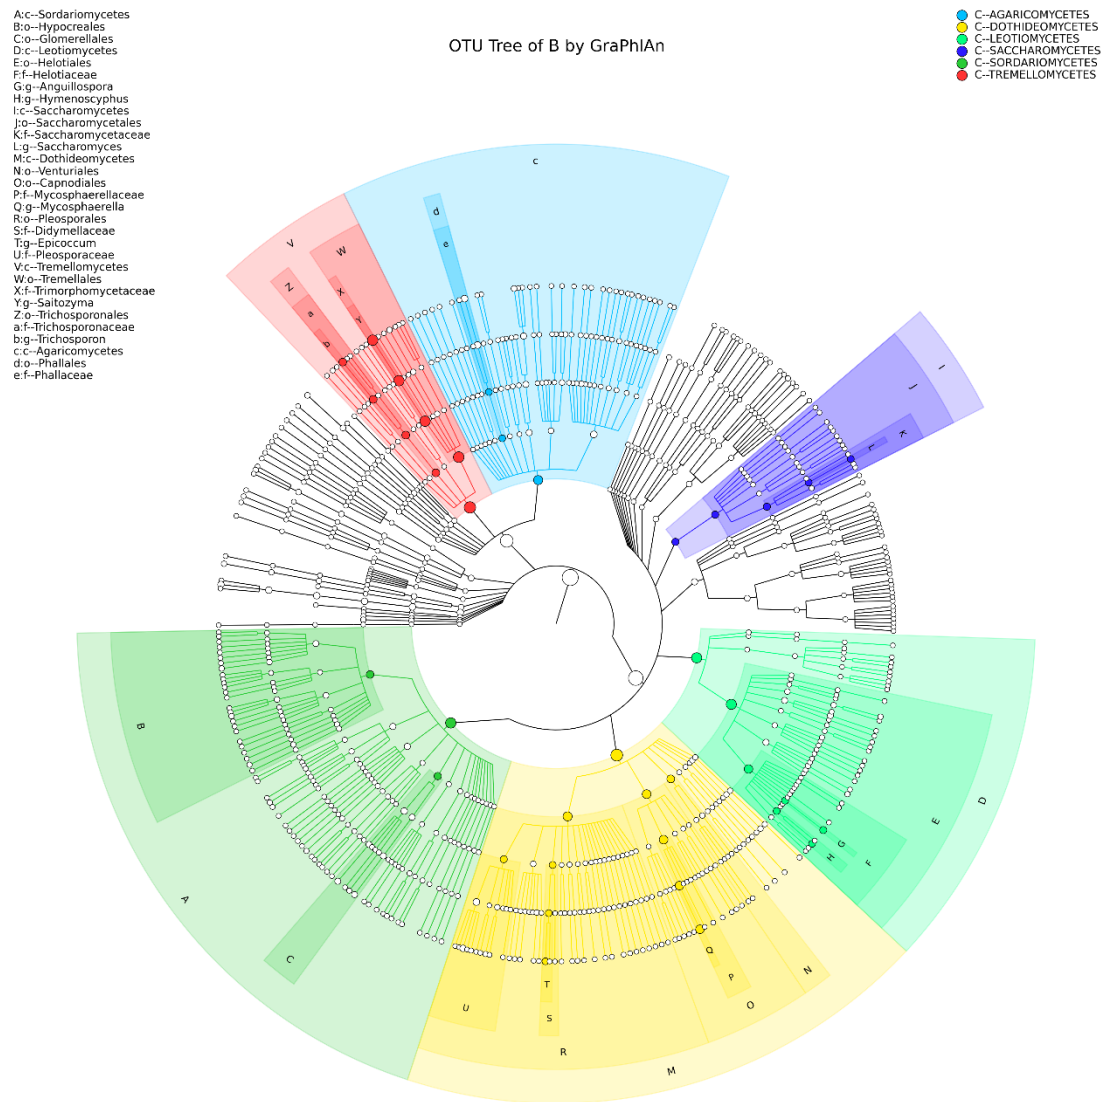

**Figure S7.** OTU annotation tree construct for group B generated by the ITS fungal region. Different taxonomic ranks range inside out. The size of circles stands for abundance of species. Different colors stand for different phyla. Solid circles stand for the top 40 species in high abundance. Full size constructs are provided as supplementary material.

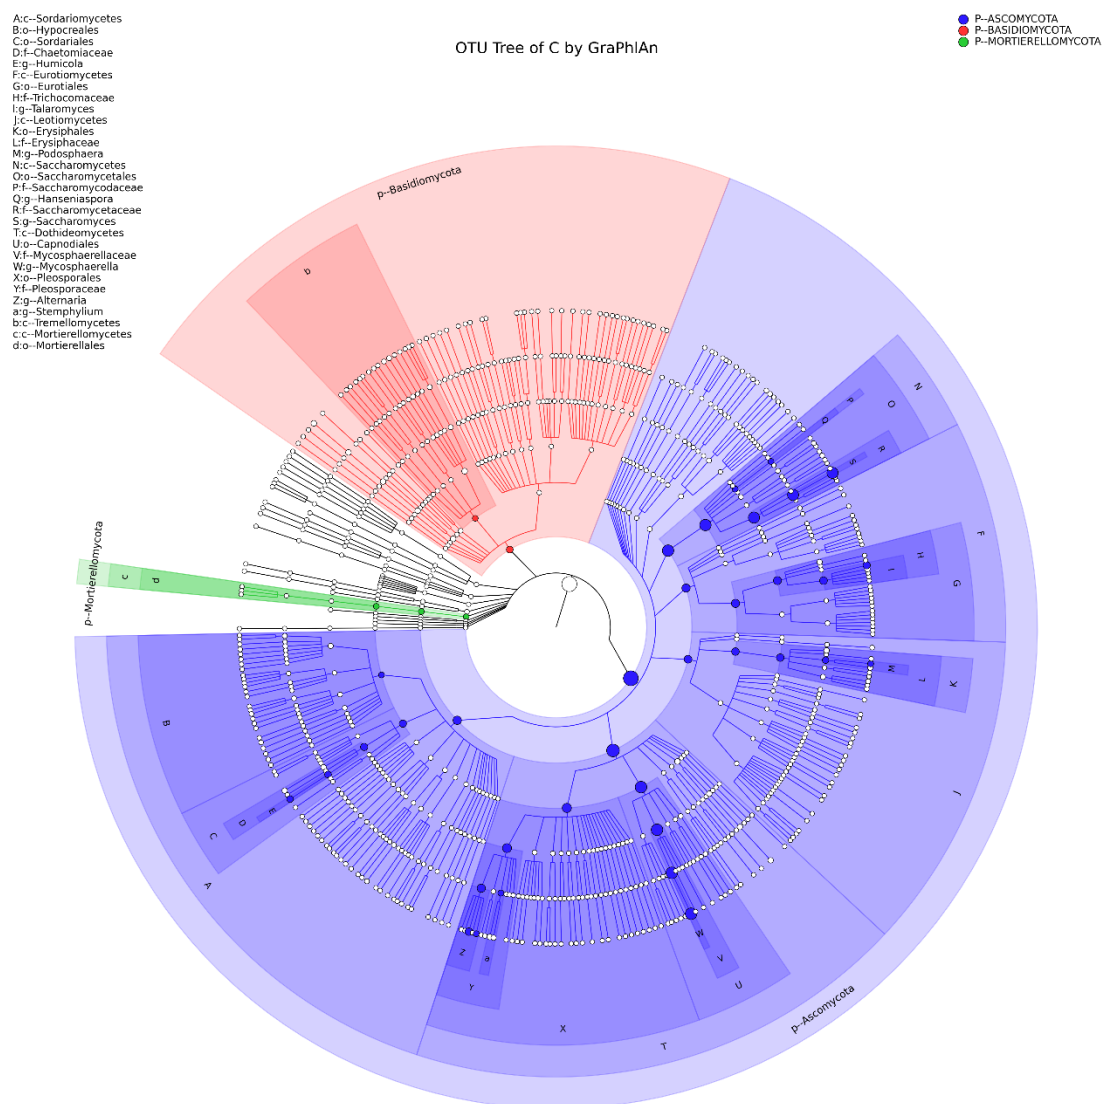

**Figure S8.** OTU annotation tree construct for group C generated by the ITS fungal region. Different taxonomic ranks range inside out. The size of circles stands for abundance of species. Different colors stand for different phyla. Solid circles stand for the top 40 species in high abundance. Full size constructs are provided as supplementary material.

A:c--Sordariomycetes  
 B:o--Sordariales  
 C:f--Chaetomiaceae  
 D:g--Botryotrichum  
 E:g--Humicola  
 F:c--Leotiomyces  
 G:o--Erysiphales  
 H:f--Erysiphaceae  
 I:g--Erysiphe  
 J:c--Pezizomycetes  
 K:o--Pezizales  
 L:f--Pezizaceae  
 M:g--Iodophanus  
 N:c--Saccharomycetes  
 O:o--Saccharomycetales  
 P:f--Saccharomycodaceae  
 Q:g--Hanseniaspora  
 R:f--Saccharomycetaceae  
 S:g--Saccharomyces  
 T:c--Dothideomycetes  
 U:o--Dothideales  
 V:f--Aureobasidiaceae  
 W:g--Aureobasidium  
 X:o--Pleosporales  
 Y:f--Pleosporaceae  
 Z:g--Alternaria  
 a:c--Ustilaginomycetes  
 b:o--Urocystidales  
 c:f--Glomosporiaceae  
 d:g--Thecaphora

OTU Tree of D by GraPhlAn

● C--DOTHIDEOMYCETES  
 ● C--LEOTIOMYCETES  
 ● C--PEZIZOMYCETES  
 ● C--SACCHAROMYCETES  
 ● C--SORDARIOMYCETES  
 ● C--USTILAGINOMYCETES

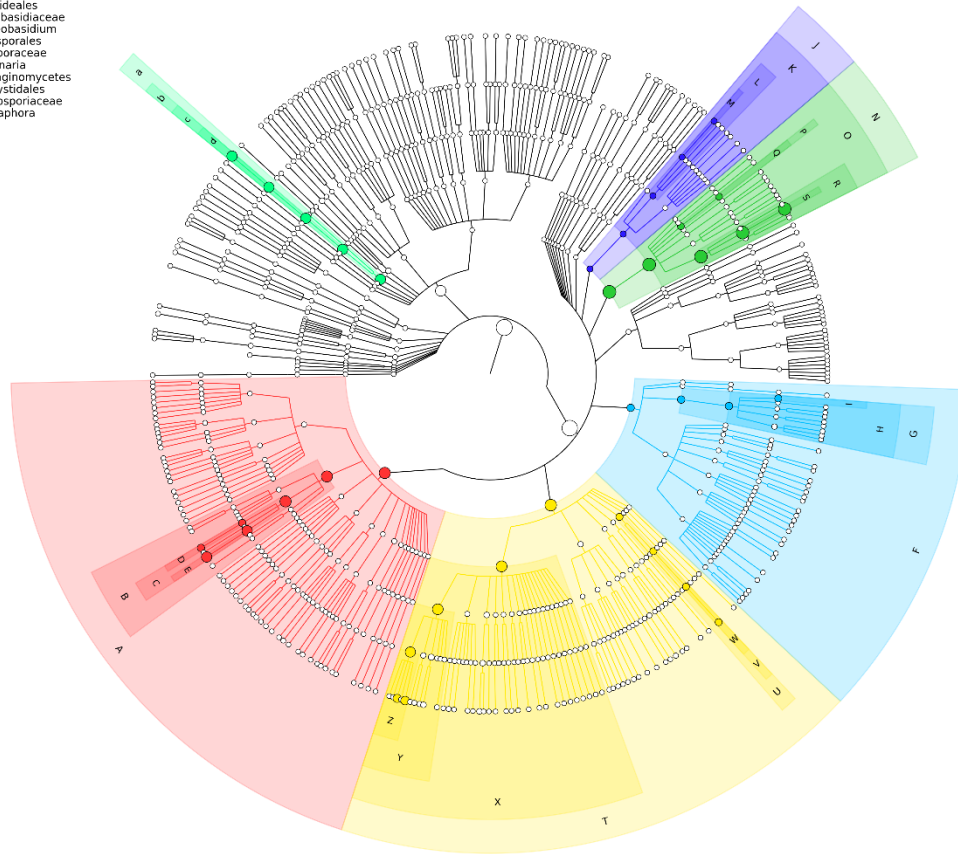

**Figure S9.** OTU annotation tree construct for group D generated by the ITS fungal region. Different taxonomic ranks range inside out. The size of circles stands for abundance of species. Different colors stand for different phyla. Solid circles stand for the top 40 species in high abundance. Full size constructs are provided as supplementary material.
